# Supplementary material
Source: PubMed Central journal article supplement (PMC3045855)
Supplement: NIHMS268580-supplement-supplement.pdf [file NIHMS268580-supplement-supplement.pdf]

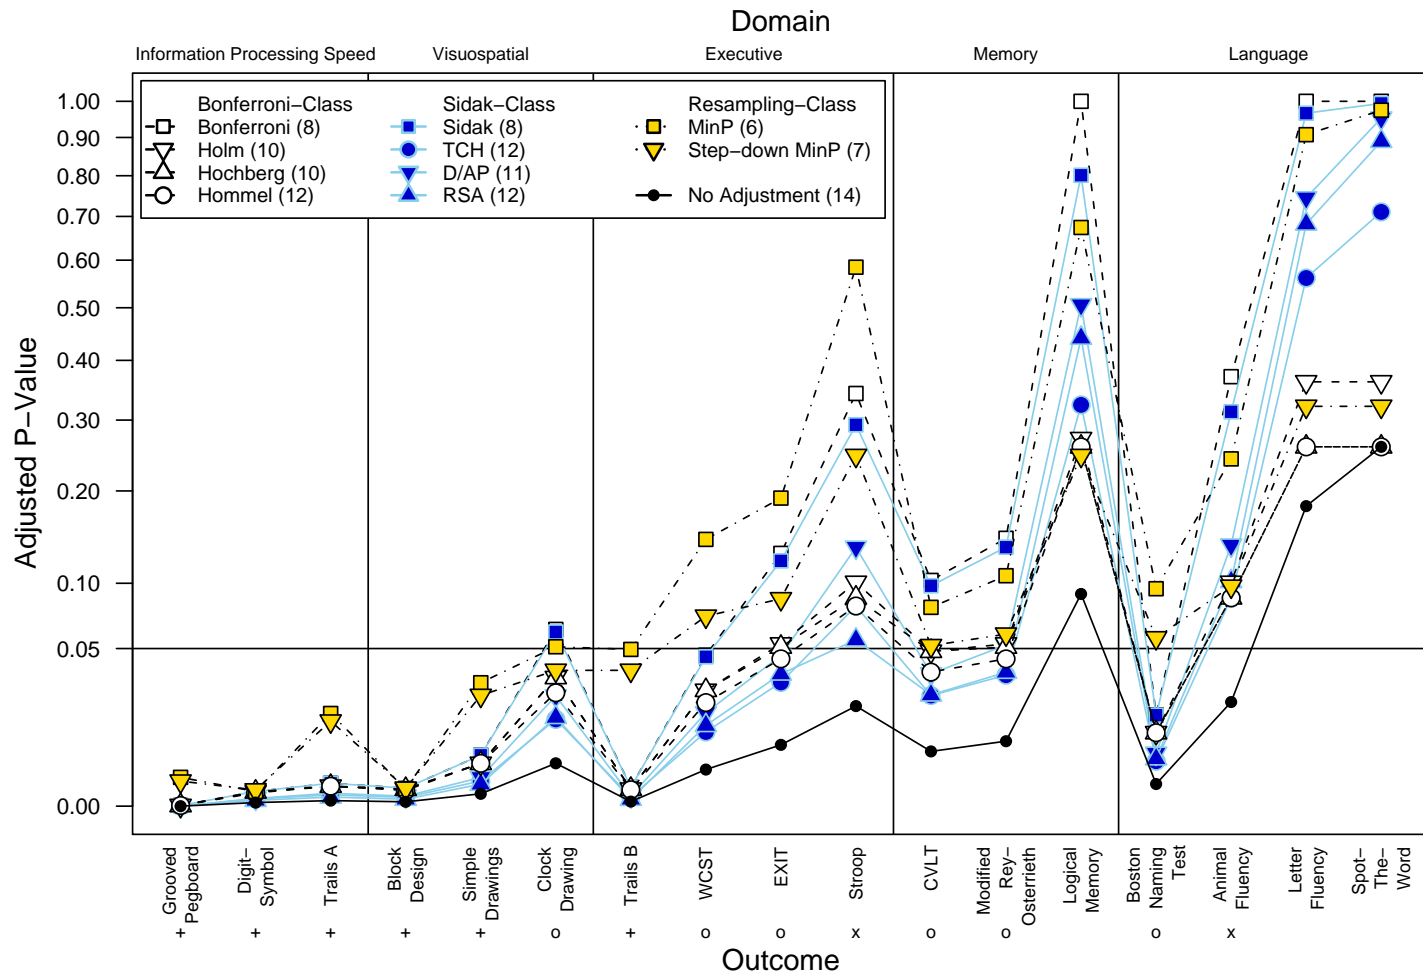

Figure 1: Adjusted  $P$ -Values by Method across Neuropsychological Outcomes

Seventeen observed  $p$ -values for a set of 17 neuropsychological measures, and adjusted  $p$ -values per each method. A square-root scale is used to reduce overlapping points. Numbers in parentheses in the legend indicate the number of rejected hypotheses for that method. Symbols for outcomes with a null hypothesis rejected without adjustment indicate the following:

- + null hypothesis rejected using each adjustment method
- × null hypothesis not rejected using any adjustment method
- o null hypothesis rejected by some adjustment methods

Note. WCST = Wisconsin Card Sorting Test, EXIT = Executive Interview, CVLT = California Verbal Learning Test. Adapted from Table 2 of Butters et al. (2004), *Archives of General Psychiatry*, 61(6), 587–595. Copyright ©(2004), American Medical Association. All rights reserved.

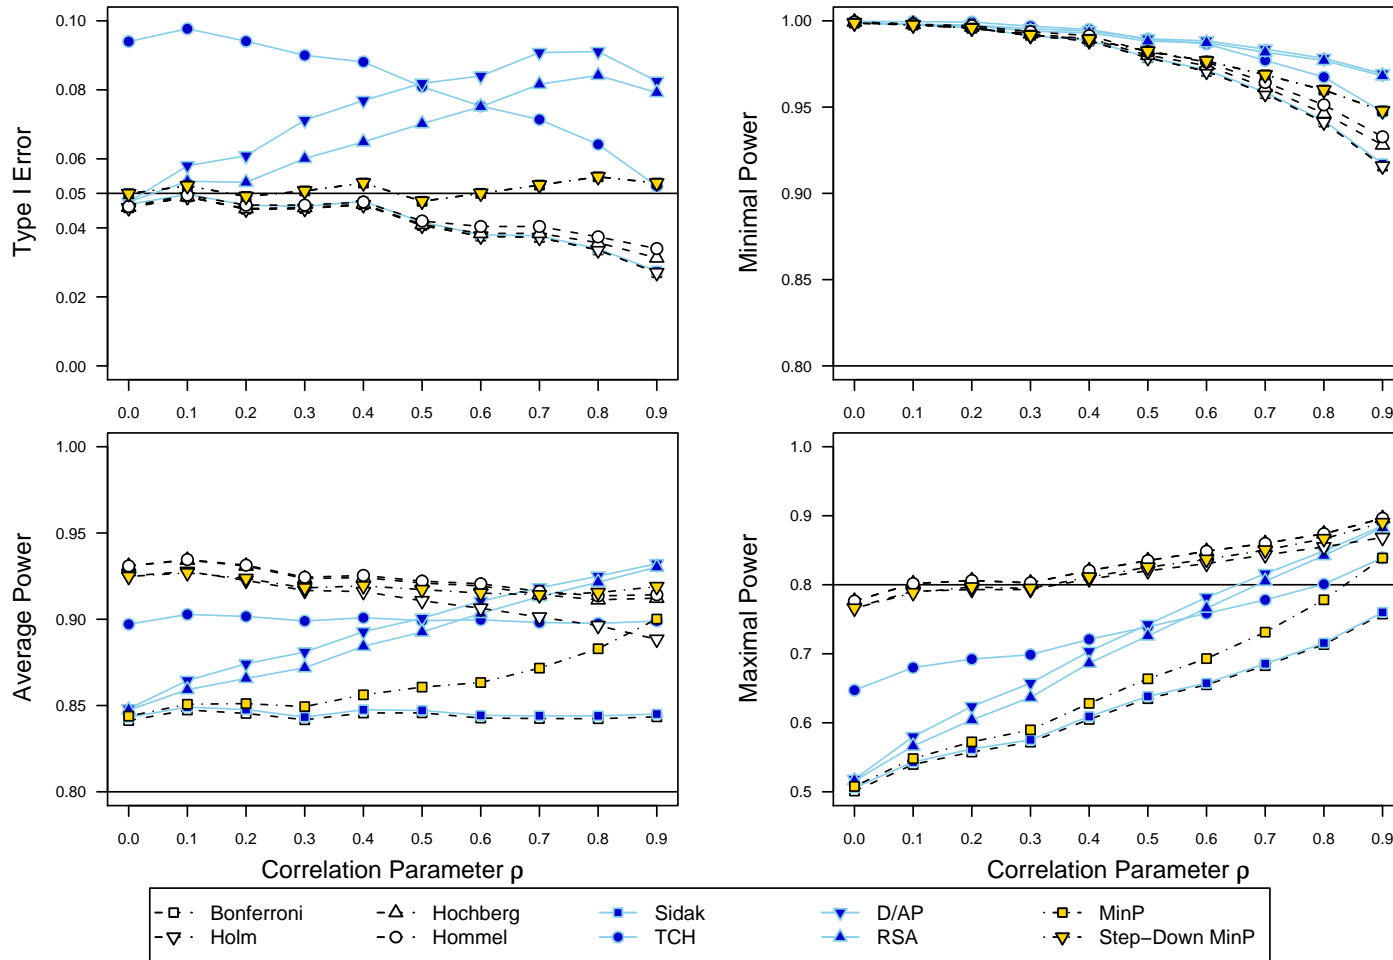

Figure 2:  $P$ -Value Adjustment Method Performance across Compound-Symmetry Correlation Structures

#### Type I Error and Power Estimates for Uniform Hypothesis Set

The upper-left panel shows Type I error rates of the  $p$ -value adjustment methods across increasing values of the CS correlation parameter  $\rho$ . In this case, all  $M = 4$  hypotheses are simulated to be true. Values near  $\alpha = .05$  are optimal. Values well above  $\alpha = .05$  indicate failure to protect Type I error at  $\alpha$ . The remaining panels show different measures of power, where the 4 hypotheses are simulated to be false. Higher power is optimal, conditional upon Type I error not exceeding  $\alpha$ .

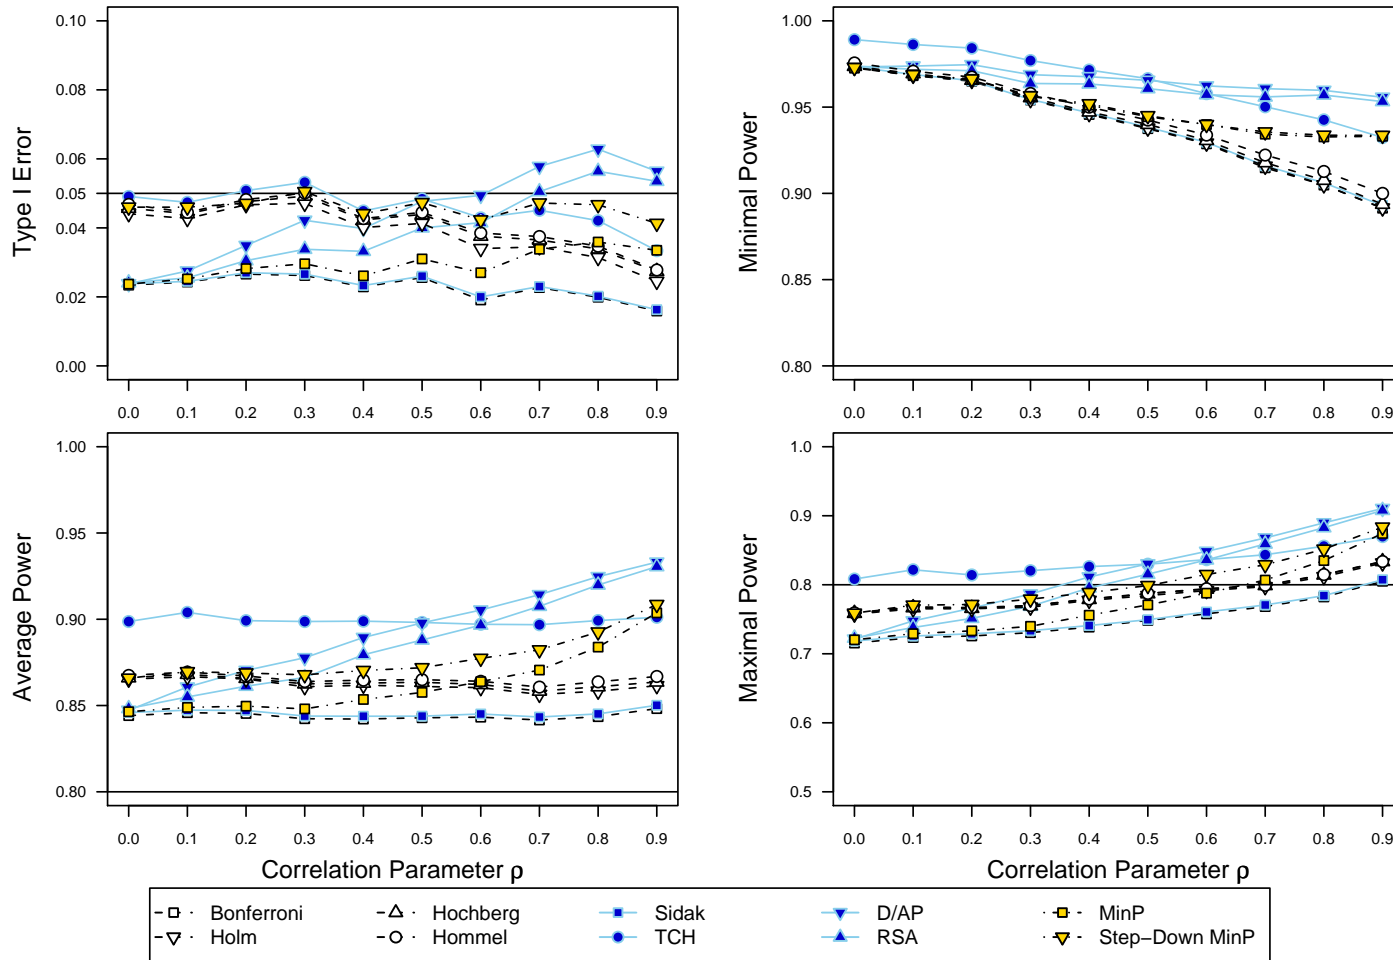

Figure 3: *P*-Value Adjustment Method Performance across Compound-Symmetry Correlation Structures

#### Type I Error and Power Estimates for Split Hypothesis Set

The upper-left panel shows Type I error rates of the *p*-value adjustment methods across increasing values of the CS correlation parameter  $\rho$ . In this case, all only 2 of the  $M = 4$  hypotheses are simulated to be true. Values near  $\alpha = .05$  are optimal. Values well above  $\alpha = .05$  indicate failure to protect Type I error at  $\alpha$ . The remaining panels show different measures of power, using the two hypotheses simulated to be false. Higher power is optimal, conditional upon Type I error not exceeding  $\alpha$ .

Table S1: Adjusted  $P$ -Values by Method across Neuropsychological Outcomes

| Domain                       | Outcome                 | No Adjustment | Bonferroni | Holm    | Hochberg | Hommel  | Sidak   | TCH     | D/AP    | RSA     | minP   | sd.minP |
|------------------------------|-------------------------|---------------|------------|---------|----------|---------|---------|---------|---------|---------|--------|---------|
| Information Processing Speed | Grooved Pegboard        | <0.0001       | <0.0001    | <0.0001 | <0.0001  | <0.0001 | <0.0001 | <0.0001 | <0.0001 | <0.0001 | 0.0017 | 0.0013  |
|                              | Digit-Symbol            | <0.0001       | 0.0004     | 0.0004  | 0.0004   | 0.0004  | 0.0004  | 0.0001  | 0.0001  | <0.0001 | 0.0004 | 0.0005  |
|                              | Trails A                | <0.0001       | 0.0011     | 0.0008  | 0.0008   | 0.0008  | 0.0011  | 0.0003  | 0.0003  | 0.0002  | 0.0173 | 0.0146  |
| Visuospatial                 | Block Design            | <0.0001       | 0.0007     | 0.0006  | 0.0006   | 0.0005  | 0.0007  | 0.0002  | 0.0002  | <0.0001 | 0.0006 | 0.0007  |
|                              | Simple Drawings         | 0.0003        | 0.0052     | 0.0037  | 0.0037   | 0.0037  | 0.0052  | 0.0013  | 0.0017  | 0.0010  | 0.0307 | 0.0247  |
|                              | Clock Drawing           | 0.0037        | 0.0629     | 0.0333  | 0.0333   | 0.0259  | 0.0611  | 0.0152  | 0.0245  | 0.0159  | 0.0511 | 0.0371  |
| Executive                    | Trails B                | <0.0001       | 0.0007     | 0.0006  | 0.0006   | 0.0005  | 0.0007  | 0.0002  | 0.0002  | <0.0001 | 0.0495 | 0.0371  |
|                              | WCST                    | 0.0027        | 0.0459     | 0.0270  | 0.0270   | 0.0216  | 0.0449  | 0.0111  | 0.0176  | 0.0131  | 0.1432 | 0.0726  |
|                              | EXIT                    | 0.0076        | 0.1286     | 0.0530  | 0.0510   | 0.0437  | 0.1211  | 0.0308  | 0.0456  | 0.0352  | 0.1910 | 0.0866  |
|                              | Stroop                  | 0.0202        | 0.3428     | 0.1008  | 0.0874   | 0.0807  | 0.2927  | 0.0806  | 0.1348  | 0.0557  | 0.5847 | 0.2475  |
| Memory                       | CVLT                    | 0.0060        | 0.1026     | 0.0483  | 0.0483   | 0.0362  | 0.0978  | 0.0246  | 0.0353  | 0.0249  | 0.0796 | 0.0519  |
|                              | Modified Rey-Osterrieth | 0.0085        | 0.1444     | 0.0530  | 0.0510   | 0.0437  | 0.1350  | 0.0346  | 0.0522  | 0.0361  | 0.1069 | 0.0596  |
|                              | Logical Memory          | 0.0906        | >0.9999    | 0.2719  | 0.2599   | 0.2599  | 0.8012  | 0.3241  | 0.5059  | 0.4410  | 0.6740 | 0.2475  |
| Language                     | Boston Naming Test      | 0.0010        | 0.0168     | 0.0109  | 0.0109   | 0.0109  | 0.0167  | 0.0041  | 0.0056  | 0.0045  | 0.0952 | 0.0570  |
|                              | Animal Fluency          | 0.0218        | 0.3713     | 0.1008  | 0.0874   | 0.0874  | 0.3130  | 0.0870  | 0.1371  | 0.1016  | 0.2428 | 0.0974  |
|                              | Language Fluency        | 0.1812        | >0.9999    | 0.3624  | 0.2599   | 0.2599  | 0.9666  | 0.5615  | 0.7446  | 0.6822  | 0.9076 | 0.3218  |
|                              | Spot-The-Word           | 0.2599        | >0.9999    | 0.3624  | 0.2599   | 0.2599  | 0.9940  | 0.7108  | 0.9528  | 0.8896  | 0.9750 | 0.3218  |

Note. WCST = Wisconsin Card Sorting Test, EXIT = Executive Interview, CVLT = California Verbal Learning Test. Adapted from Table 2 of Butters et al. (2004), *Archives of General Psychiatry*, 61(6), 587–595. Copyright ©(2004), American Medical Association. All rights reserved.

Table S2: BS Simulation Series Parameters

| Hypothesis Sets | Outcome Types |    |         |    |
|-----------------|---------------|----|---------|----|
|                 | Block 1       |    | Block 2 |    |
|                 | V1            | V2 | V3      | V4 |
| Uniform - True  | TN            | TN | TN      | TN |
| Uniform - False | FN            | FN | FN      | FN |
| Split - Uniform | TN            | TN | FN      | FN |
| Split - Split   | TN            | FN | FN      | TN |

The  $M$  outcomes of the  $r^{th}$  replicate in a given trial are simulated according to the choice of hypothesis set. Outcomes  $V1-V4$  may be one of two types. True null (TN) outcomes are simulated with effect size 0.0, and are used to estimate Type I error. False null (FN) outcomes are simulated with effect size 0.5, and are used to estimate power.

| Correlation Structure | V1  | V2  | V3  | V4  |
|-----------------------|-----|-----|-----|-----|
| V1                    | 1   | $W$ | $B$ | $B$ |
| V2                    | $W$ | 1   | $B$ | $B$ |
| V3                    | $B$ | $B$ | 1   | $W$ |
| V4                    | $B$ | $B$ | $W$ | 1   |

Data may be simulated with a block symmetry (BS) correlation structure, where all outcomes within a block are equicorrelated with parameter  $W$ , and outcomes from different blocks are equicorrelated with parameter  $B$ , where  $W > B$ . The  $W$  and  $B$  parameters take on values of  $\{0.2, 0.5, 0.8\}$  and  $\{0.0, 0.2, 0.5\}$ , respectively.

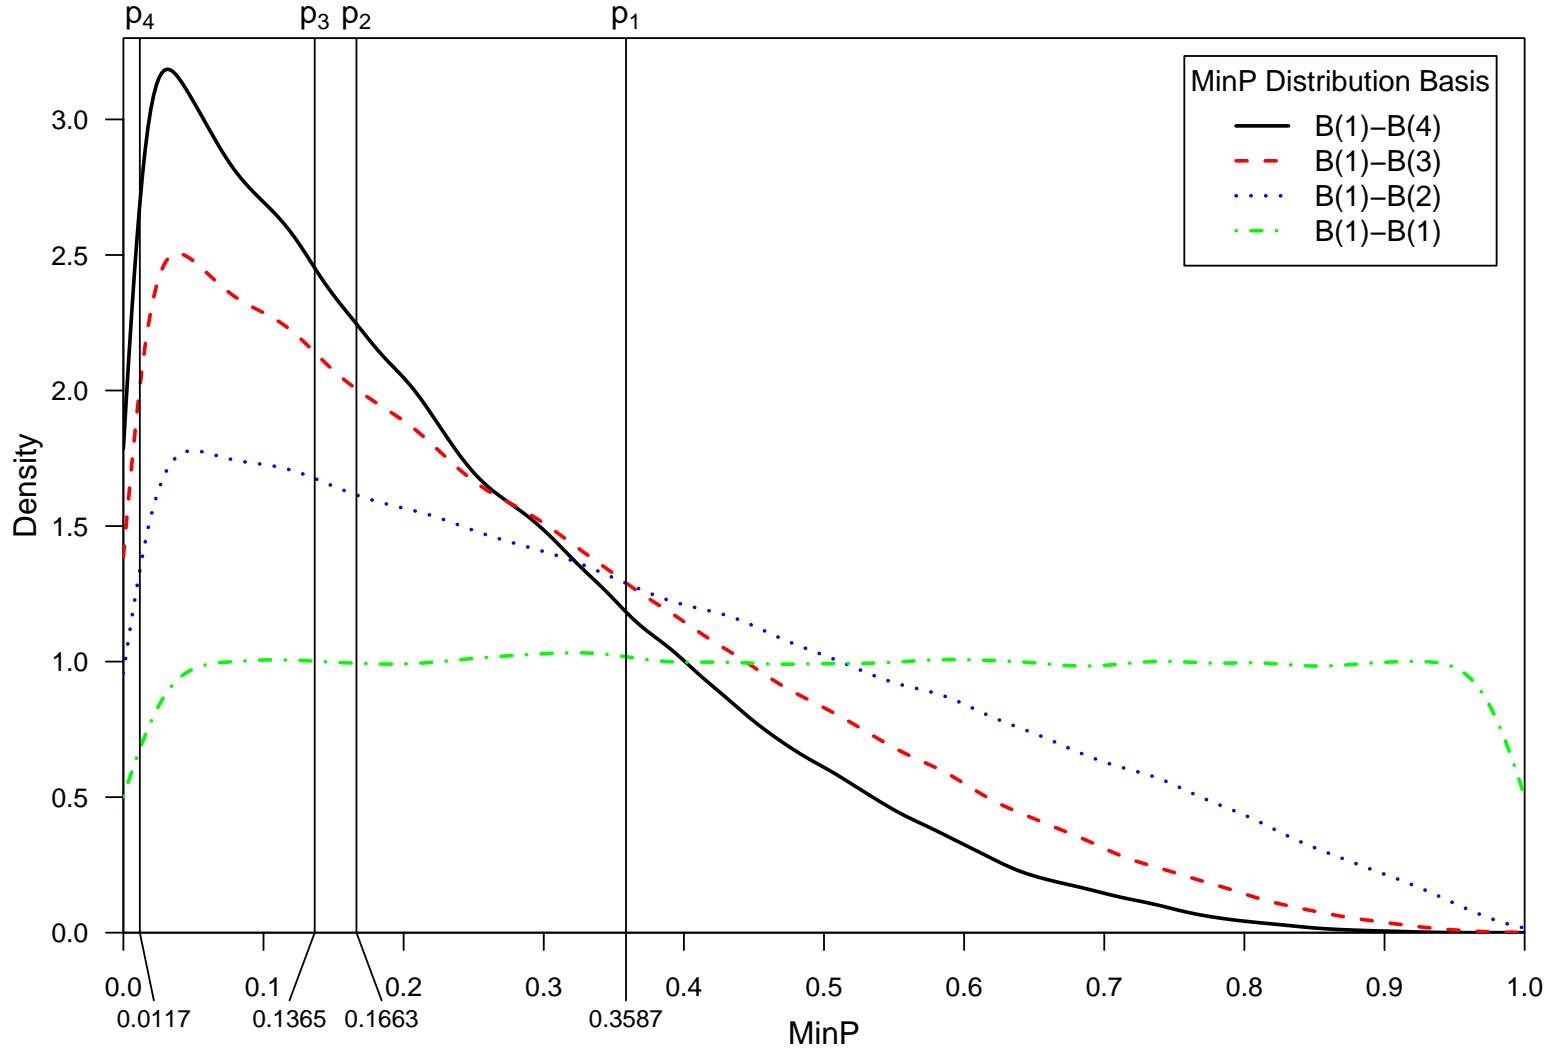

Figure S1: Bootstrap Empirical MinP Null Distributions for the Illustrative Example

For the minP method, an adjusted  $p$ -value  $p_{aj}$ ,  $j = 1$  to 4, is calculated by the area left of  $p_j$  and below the distribution curve based on all bootstrap outcomes,  $B(1)$ - $B(4)$ . For the sd.minP method,  $p_{aj}$ ,  $j = 1$  to 4, is calculated by the area left of  $p_j$  and below the distribution curve based on outcomes  $B(1)$ - $B(j)$ , and adjusted to ensure the same order of the observed  $p_j$ 's.

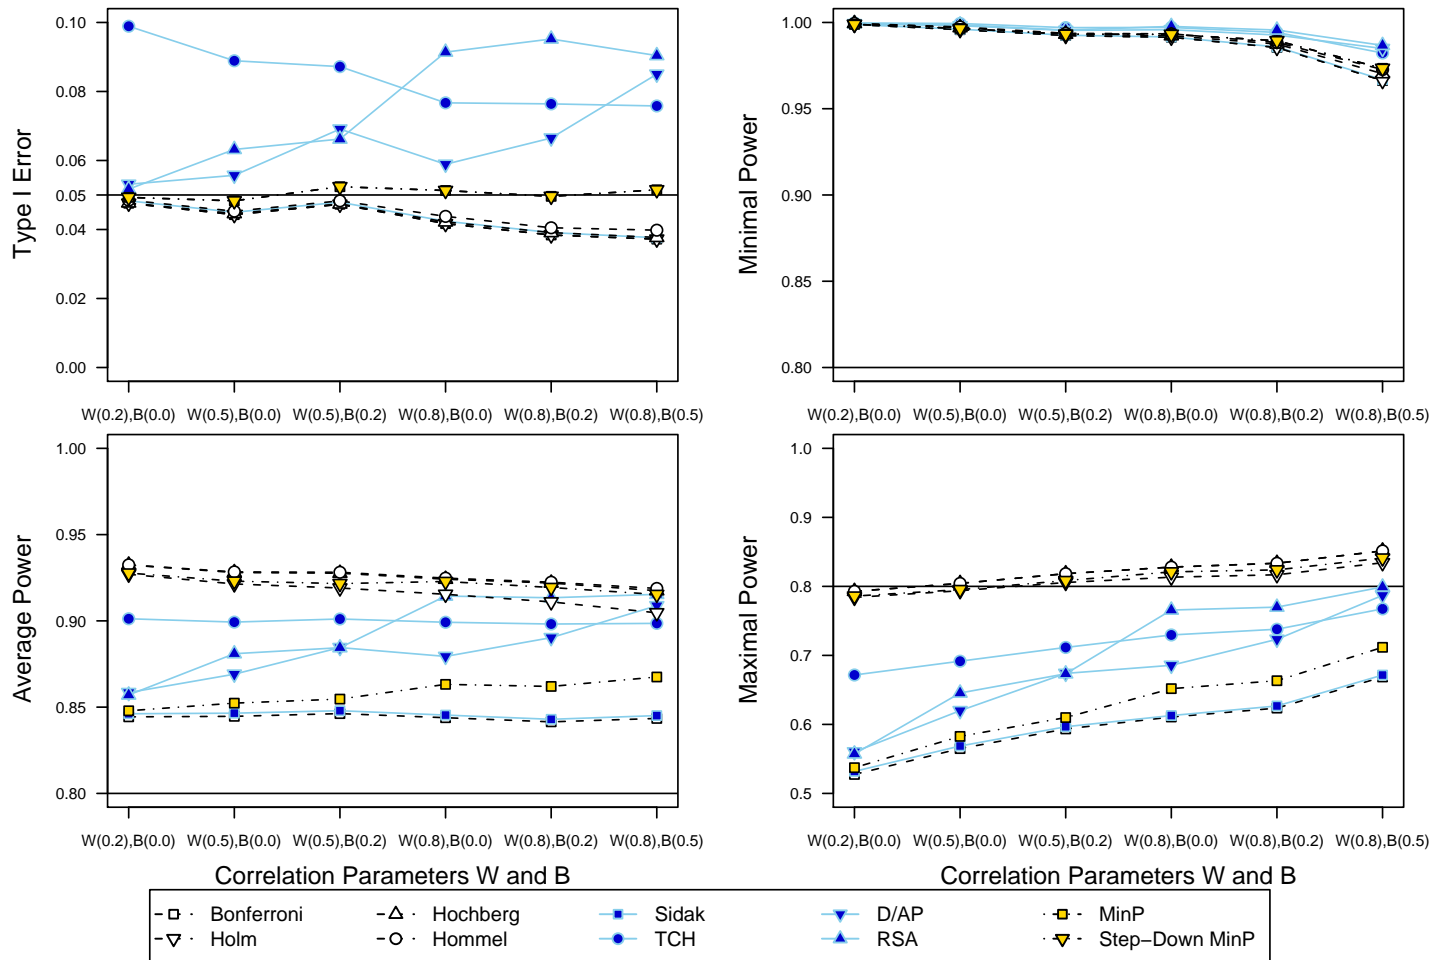

Figure S2:  $P$ -Value Adjustment Method Performance across Block-Symmetry Correlation Structures

Type I Error and Power Estimates for Uniform Hypothesis Set

Each figure represents a different hypothesis set. The upper-left panel of each figure shows Type I error rates of the  $p$ -value adjustment methods across increasing values of the block-symmetry correlation parameters  $B$  and  $W$ . Values near  $\alpha = 0.05$  are optimal. Values well above  $\alpha = 0.05$  indicate failure to protect Type I error at  $\alpha$ . Higher power is optimal, conditional upon Type I error not exceeding  $\alpha$ .

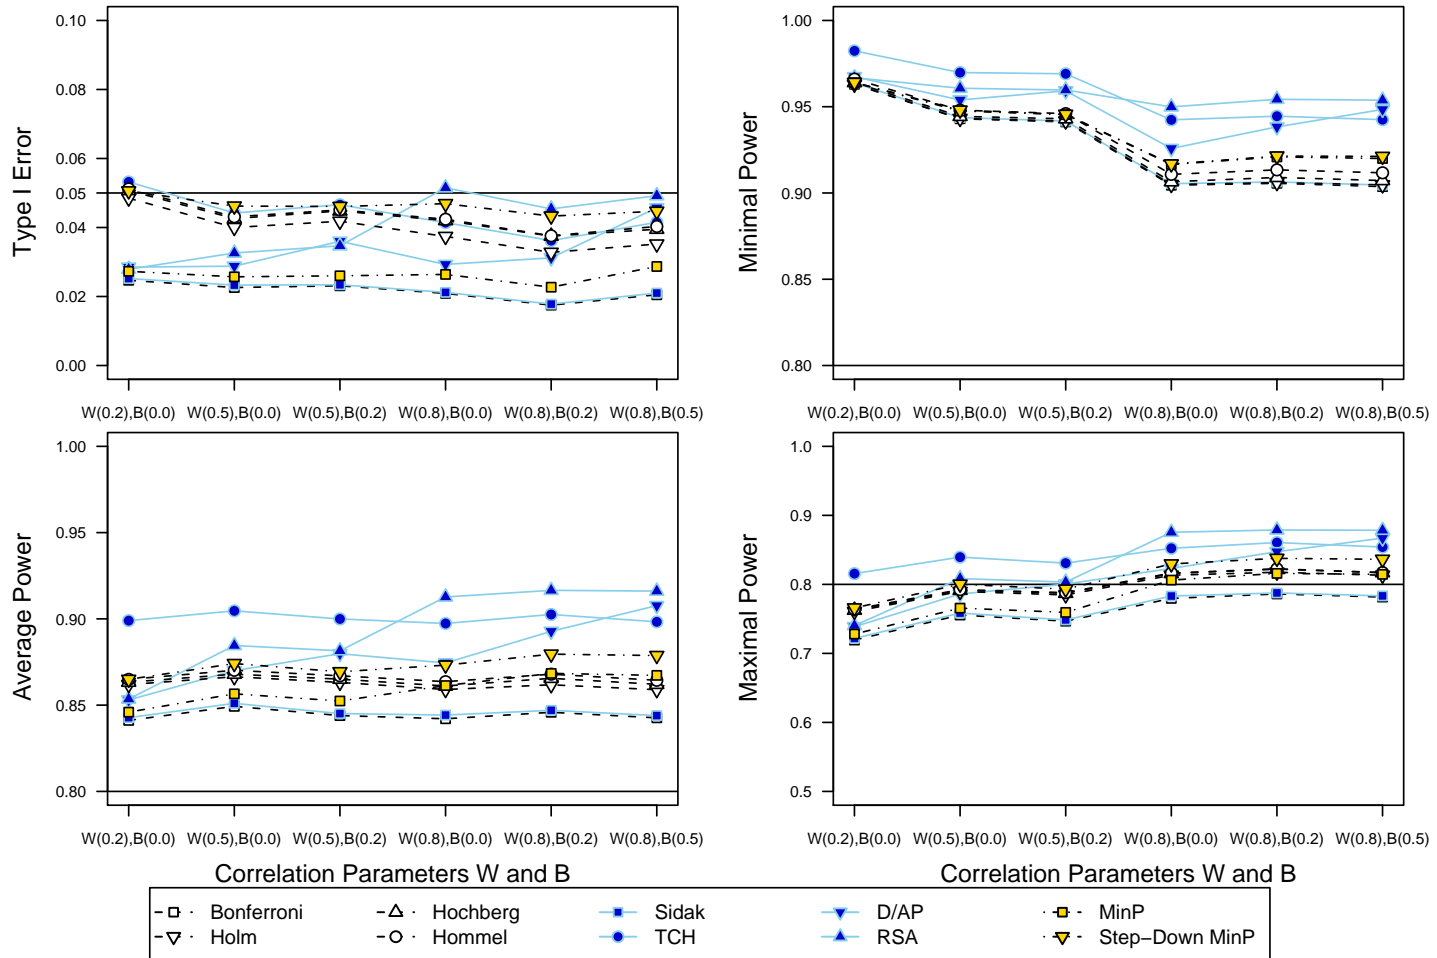

Figure S3:  $P$ -Value Adjustment Method Performance across Block-Symmetry Correlation Structures

Type I Error and Power Estimates for Split - Uniform Hypothesis Set

Each figure represents a different hypothesis set. The upper-left panel of each figure shows Type I error rates of the  $p$ -value adjustment methods across increasing values of the block-symmetry correlation parameters  $B$  and  $W$ . Values near  $\alpha = 0.05$  are optimal. Values well above  $\alpha = 0.05$  indicate failure to protect Type I error at  $\alpha$ . Higher power is optimal, conditional upon Type I error not exceeding  $\alpha$ .



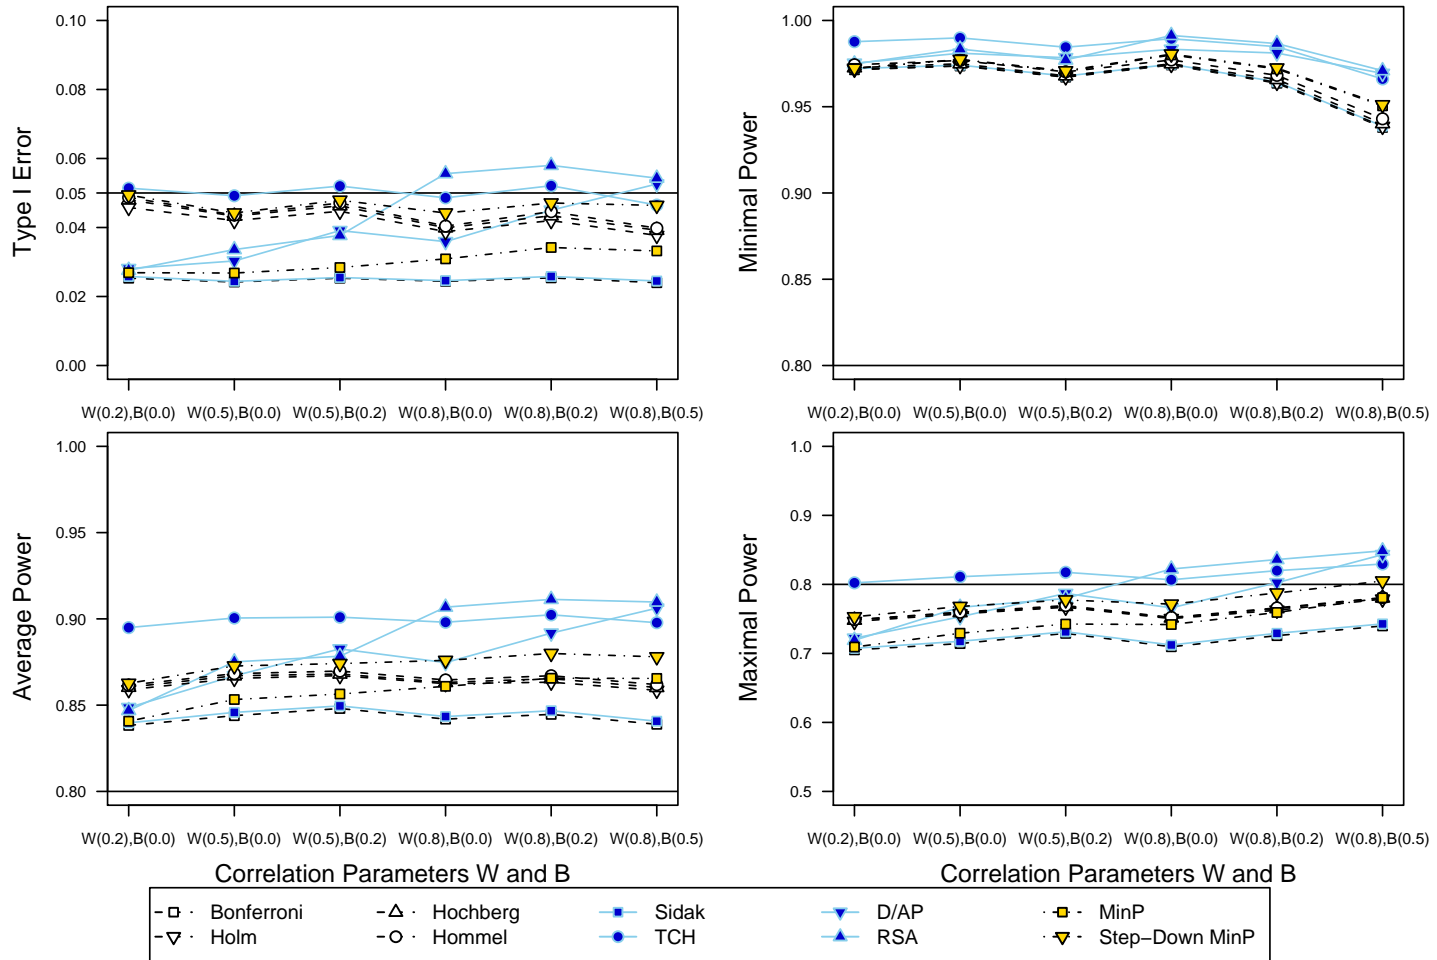

Figure S4:  $P$ -Value Adjustment Method Performance across Block-Symmetry Correlation Structures

Type I Error and Power Estimates for Split - Split Hypothesis Set

Each figure represents a different hypothesis set. The upper-left panel of each figure shows Type I error rates of the  $p$ -value adjustment methods across increasing values of the block-symmetry correlation parameters  $B$  and  $W$ . Values near  $\alpha = 0.05$  are optimal. Values well above  $\alpha = 0.05$  indicate failure to protect Type I error at  $\alpha$ . Higher power is optimal, conditional upon Type I error not exceeding  $\alpha$ .
